# Supplementary material
Source: ML conference proceedings conference paper supplement (https://openreview.net/forum?id=S8hg5LpFvz)
Supplement: supplementary_material [file attachment]

Anonymous Authors  
May 23, 2023

Editors-in-Chief and Peer Reviewers  
NeurIPS 2023

**Subject: Correction of inaccuracies in the submitted paper:**

$p$ -Poisson surface reconstruction in irrotational flow from point clouds

There were a few unintentional inaccuracies in the submitted manuscript, so it is necessary to share them with the Editors-in-Chief and peer reviewers for the sake of scientific accuracy, and their invaluable expertise and insight in evaluating the submitted work.

- The result of SIREN in Table 2 on page 7 were incorrectly reported. In the correct table below, the results of SIREN follow the experimental setup of the SIREN’s official code <sup>1</sup> (MIT License). The superiority of the results remains almost the same, so none of the

Table 1: Results on surface reconstruction of Thingi10K.

| Model | Squirrel        |                 | Buser head      |                 | Screwstar       |                 | Frogrock        |                  | Pumpkin         |                  |
|-------|-----------------|-----------------|-----------------|-----------------|-----------------|-----------------|-----------------|------------------|-----------------|------------------|
|       | $d_C$           | $d_H$           | $d_C$           | $d_H$           | $d_C$           | $d_H$           | $d_C$           | $d_H$            | $d_C$           | $d_H$            |
| IGR   | 0.36            | 11.97           | 0.38            | 5.95            | 0.18            | 3.02            | 0.48            | 12.05            | 0.11            | <b>1.13</b>      |
| SIREN | <del>0.47</del> | <del>5.56</del> | <del>0.37</del> | <del>3.87</del> | <del>0.24</del> | <del>4.04</del> | <del>0.58</del> | <del>13.05</del> | <del>1.11</del> | <del>16.65</del> |
| SIREN | 0.47            | <b>5.66</b>     | 0.43            | <b>4.81</b>     | 0.27            | 4.98            | 0.78            | 14.75            | 0.46            | 5.03             |
| DiGS  | 0.50            | 12.45           | 0.39            | 10.64           | 0.26            | 6.33            | 0.45            | <b>10.50</b>     | 0.32            | 8.03             |
| PINC  | <b>0.35</b>     | 11.55           | <b>0.37</b>     | 6.19            | <b>0.17</b>     | <b>3.00</b>     | <b>0.43</b>     | 11.06            | <b>0.10</b>     | 1.90             |

main arguments in the paper are affected. We have also revised the qualitative results of SIREN in Figure 3. We have thoroughly checked all numerical values once again and confirm that there are no errors anymore and that the reported numerical results are reproducible using the provided source code.

- There is also a typographical error in Figure 7 on page 9. The caption  $p = 5$  of the middle figure should be corrected to  $p = 10$ .
- Some of the incomplete information in the reference, such as missing numbers, is now completed.

We sincerely apologize for any inconvenience and assure you that the mentioned inaccuracies were completely unintentional. We are committed to the highest standards of scientific rigor and integrity. We appreciate your understanding and your attention to this matter.

Best regards,  
Anonymous Authors

---

<sup>1</sup><https://github.com/vsitzmann/siren>
